# Supplementary material for: A loss-of-function variant in SSFA2 causes male infertility with globozoospermia and failed oocyte activation
Source: Springer Nature journal article supplement (doi:10.1186/s12958-022-00976-5), 2022-07-14
Supplement: MOESM1 [file 23268524]

1 **A loss-of-function variant in *SSFA2* causes male infertility with**  
2 **globozoospermia and failed oocyte activation**

3 *Huang et al.*

4

5 **Supplementary information**

6 **Supplementary Figures**

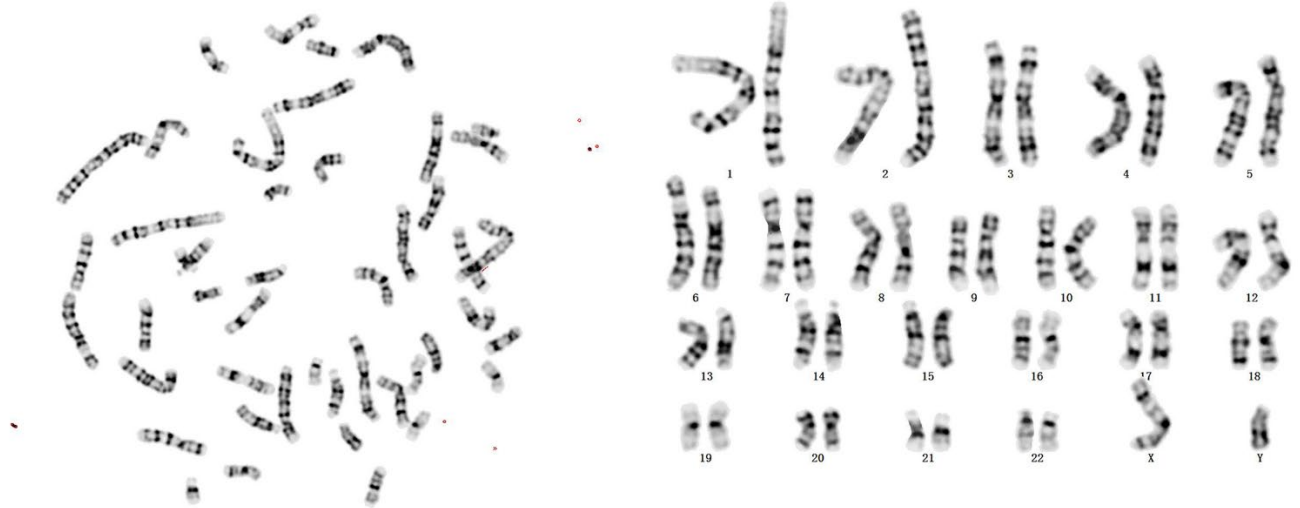

7

8 **Supplemental Figure S1. Karyotype analysis of the patient: normal male karyotype 46, XY.**

9

10

11

12

13

14

15

16

17

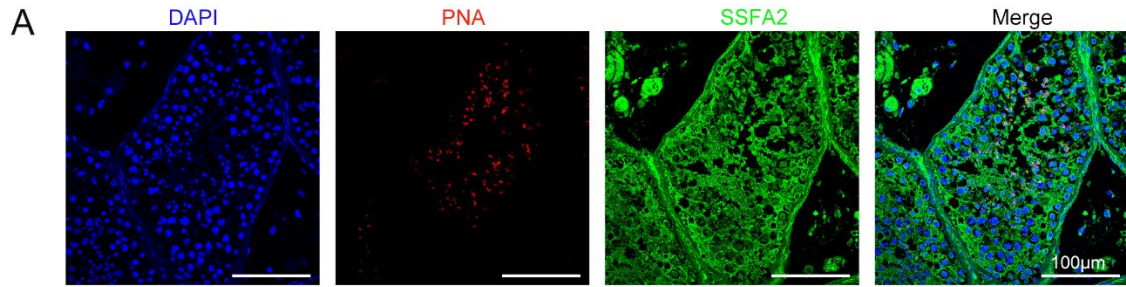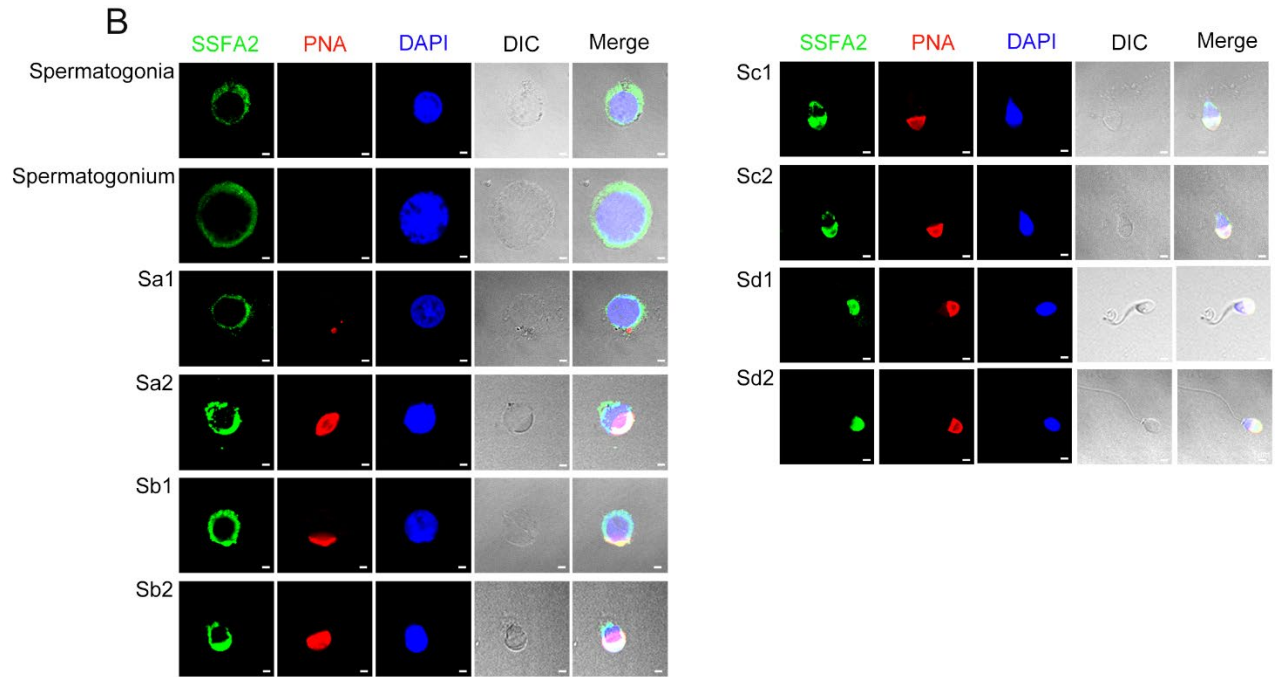

18

19 **Supplemental Figure S2. The expression pattern of SSFA2 in humans.**

20 (A) SSFA2 showed higher expression in early and late spermatids, whereas it was also expressed  
 21 in spermatogonia and spermatocytes (green, SSFA2; red, PNA; blue, DAPI; scale bars, 100 µm).

22 (B) The expression pattern of SSFA2 in spermatogenic cells at different stages. Sa1-Sb1, round  
 23 spermatid. Sb2-Sd2, elongating spermatids (green, SSFA2; red, PNA; blue, DAPI; scale bars, 1  
 24 µm).

25

26 **Supplementary tables**

27 **Supplemental Table SI. Basal blood hormone levels**

| Hormone               | Baseline | Reference Range | 28 |
|-----------------------|----------|-----------------|----|
| E2 (pmol/L)           | 41.0     | 0-156           | 29 |
| FSH (mIU/mL)          | 3.2      | 1.5-12.4        |    |
| LH (mIU/mL)           | 2.2      | 1.7-8.8         | 30 |
| PRL (mIU/L)           | 283.4    | 86-324          |    |
| Testosterone (nmol/L) | 14.2     | 8.6-29.0        | 31 |

32

33

34

35

36

37

38

39

40

41

42

43

44

45

46 **Supplemental Table SII. Analysis of *SSFA2* Variant in the patient**

47

|                          |                   |
|--------------------------|-------------------|
| Phenotype                | Globozoospermia   |
| cDNA mutation            | c.3671G>A         |
| Genotype                 | Homozygous        |
| Protein alteration       | p.R1224Q          |
| Mutation type            | Missense          |
| dbSNP                    | 0                 |
| Allele frequency in ExAC | 0                 |
| 1000G project            | 0                 |
| gnomAD                   | 0.00000427        |
| Function prediction      |                   |
| SIFT                     | Deleterious       |
| PolyPhen-2               | Probably damaging |
| CADD_phred               | 24.1 <sup>a</sup> |
| Mutation Taster          | Disease causing   |

48 \*The GenBank accession number for *SSFA2*: NM\_001130445.3

49 <sup>a</sup> The points>10 means deleterious

50
